# Supplementary material for: Clinicopathological Characteristics of Primary Pulmonary Hodgkin Lymphoma (PPHL): Two Institutional Experiences with Comprehensive Literature Review of 115 PPHL Cases
Source: MDPI journal article supplement (doi:10.3390/jcm12010126), 2022-12-23
Supplement: s1 [file s1]

**Supplementary Table S1.** Detailed clinicopathological characteristics of our 10 PPHL cases.

| Case No                            | 1                          | 2                               | 3                       | 4                           | 5                              | 6                        | 7                           | 8                              | 9                    | 10                          |
|------------------------------------|----------------------------|---------------------------------|-------------------------|-----------------------------|--------------------------------|--------------------------|-----------------------------|--------------------------------|----------------------|-----------------------------|
| Sex                                | Female                     | Male                            | Male                    | Female                      | Male                           | Female                   | Female                      | Female                         | Female               | Male                        |
| Age at diagnosis (years)           | 71                         | 37                              | 39                      | 41                          | 33                             | 47                       | 27                          | 41                             | 48                   | 72                          |
| Smoking history                    | None                       | Current                         | Current                 | None                        | Ex                             | None                     | None                        | None                           | None                 | None                        |
| Symptom                            | Cough                      | Cough, sputum, chest discomfort | Cough, chest pain       | Left axillary pain          | Cough, weight loss             | None                     | Cough                       | None                           | None                 | Cough                       |
| Radiological findings              | Single mass, 4.5 cm        | Single mass, 4.3 cm             | Single mass, 6.5 cm     | Single mass, 4.1 cm         | Single mass, 5.0 cm            | Single mass, 7.8 cm      | Single mass, 10.5 cm        | Single mass, 6.4 cm            | Consolidation        | Consolidation               |
| Mediastinal LAP                    | Present                    | Present                         | Present                 | Present                     | Present                        | Present                  | Present                     | Present                        | Absent               | Present                     |
| Sputum cytology                    | Negative                   | Negative                        | ND                      | ND                          | ND                             | ND                       | ND                          | ND                             | ND                   | ND                          |
| Bronchial washing cytology         | Negative                   | Negative                        | Negative                | ND                          | Negative                       | Negative                 | ND                          | ND                             | Negative             | Negative                    |
| Lung aspiration cytology           | Negative                   | A single RS-like cell           | ND                      | ND                          | Negative                       | ND                       | Rare atypical cells         | ND                             | ND                   | ND                          |
| Needle biopsy diagnosis (location) | Mixed cellularity HL (MLN) | Lymphocyte-rich HL (lung)       | Suggestive of HL (lung) | Atypical pneumocytes (lung) | Classic HL, unspecified (lung) | CGI with necrosis (lung) | Nodular sclerosis HL (lung) | Classic HL, unspecified (lung) | ND                   | Mixed cellularity HL (lung) |
| Preoperative management            | None                       | None                            | None                    | NAC                         | None                           | Anti-TB medication       | None                        | None                           | Anti-TB medication   | Antibiotics                 |
| Surgical resection (diagnosis)     | ND                         | Lymphocyte-rich HL              | ND                      | Nodular sclerosis HL        | ND                             | Nodular sclerosis HL     | ND                          | ND                             | Nodular sclerosis HL | ND                          |
| Treatment                          | CTx                        | CTx                             | CTx                     | CTx                         | CTx                            | CTx                      | CTx                         | CTx                            | CTx                  | ND                          |
| Response                           | NA (LTF)                   | CR                              | CR                      | CR                          | CR                             | CR                       | CR                          | CR                             | CR                   | NA                          |
| Survival status                    | Alive                      | Alive                           | Alive                   | Alive                       | Alive                          | Alive                    | Alive                       | Alive                          | Alive                | Dead                        |
| Observation period                 | 4 years                    | 21 years                        | 8 years                 | 5 years                     | 2 years                        | 5 years                  | 5 years                     | 4 years                        | 4 years              | 1 month                     |

CGI: chronic granulomatous inflammation; CTx: Chemotherapy; CR: complete remission; HL: Hodgkin lymphoma; LAP: lymphadenopathy; LTF: lost to follow-up; MLN: mediastinal lymph node; NAC: neoadjuvant chemotherapy; ND: not done; PD: progressive disease; PR: partial response; RS: Reed-Sternberg; TB: tuberculosis.

**Supplementary Table S2.** Immunostaining and EBER-ISH results of our 10 PPHL cases.

| Case No              | 1                 | 2                | 3        | 4                 | 5           | 6                 | 7                 | 8           | 9                 | 10                |
|----------------------|-------------------|------------------|----------|-------------------|-------------|-------------------|-------------------|-------------|-------------------|-------------------|
| Histological subtype | Mixed cellularity | Lymphocyte -rich | NOS      | Nodular sclerosis | Unspecified | Nodular sclerosis | Nodular sclerosis | Unspecified | Nodular sclerosis | Mixed cellularity |
| CD30                 | Positive          | ND               | Positive | Positive          | Positive    | Positive          | Positive          | Positive    | Positive          | Positive          |
| CD15                 | ND                | Positive         | Negative | Focal positive    | Negative    | Focal positive    | Positive          | Equivocal   | Positive          | Equivocal         |
| CD20                 | ND                | Negative         | Negative | ND                | Negative    | Negative          | Negative          | Negative    | Negative          | Negative          |
| PAX5                 | ND                | ND               | Positive | Positive          | Positive    | Positive          | Positive          | Positive    | Positive          | Positive          |
| CD3                  | ND                | Negative         | Negative | ND                | Negative    | ND                | ND                | Negative    | Negative          | Negative          |
| CD4                  | ND                | ND               | Negative | ND                | ND          | ND                | ND                | ND          | Positive          | ND                |
| EBER-ISH             | ND                | ND               | Negative | Negative          | Negative    | Negative          | Negative          | Negative    | Negative          | Negative          |

ND: not done; NOS: not otherwise specified.

**Supplementary Table S3.** Demographic features of 115 PPHL cases.

|                 |      |       |       |       |       |       |       |       |       |                |
|-----------------|------|-------|-------|-------|-------|-------|-------|-------|-------|----------------|
| Age (years)     | 0–10 | 11–20 | 21–30 | 31–40 | 41–50 | 51–60 | 61–70 | 71–80 | 81–90 | Total          |
| Number of cases | 0    | 14    | 30    | 22    | 21    | 9     | 10    | 8     | 1     | 115            |
| Male (M)        | 0    | 8     | 11    | 12    | 8     | 5     | 4     | 3     | 0     | 51             |
| Female (F)      | 0    | 6     | 19    | 10    | 13    | 4     | 6     | 5     | 1     | 64             |
| M:F before 1990 | 0:0  | 3:3   | 5:10  | 4:7   | 4:6   | 4:1   | 3:4   | 2:4   | 0:1   | 25:36 (1:1.44) |
| M:F from 1990   | 0:0  | 5:3   | 6:9   | 8:3   | 4:7   | 1:3   | 1:2   | 1:1   | 0:0   | 26:28 (1:1.08) |

**Supplementary Table S4.** Clinicopathologic features of 115 PPHL cases.

| Author<br>(year<br>published) | Sex<br>(number<br>of cases) | Age                           | Radiology                                                                                                                                                                                                                                         | LAP<br>(number<br>of cases)      | Initial clinical impression<br>(number of cases)                                                                       | Initial pathological<br>diagnosis (number of cases)                                                                                                                                           | Confirmatory<br>method (number<br>of cases)                                                            | Histological<br>subtype<br>(number of<br>cases) |
|-------------------------------|-----------------------------|-------------------------------|---------------------------------------------------------------------------------------------------------------------------------------------------------------------------------------------------------------------------------------------------|----------------------------------|------------------------------------------------------------------------------------------------------------------------|-----------------------------------------------------------------------------------------------------------------------------------------------------------------------------------------------|--------------------------------------------------------------------------------------------------------|-------------------------------------------------|
| Radin (1990)                  | F (36);<br>M (25)           | 19-82<br>(F);<br>12-77<br>(M) | Single mass (17); single mass with<br>cavitation (8); multiple mass (16);<br>multiple mass with cavitation (1);<br>infiltration/ consolidation (8);<br>infiltration/consolidation with<br>cavitation (3); mixed (4); mixed<br>with cavitation (1) | Yes (15);<br>no (31);<br>NA (15) | Abscess or HL (1); carcinoma<br>(1); bronchial adenoma (1);<br>pneumonia (1); eosinophilic<br>pneumonitis (1); NA (56) | HL or suggestive of HL (11);<br>non-diagnostic (3); interstitial<br>lymphocytic pneumonitis (1);<br>NA (46)                                                                                   | Initial biopsy (11);<br>repeated biopsy (1);<br>surgical resection<br>(21); postmortem (2);<br>NA (26) | NS (16); MC<br>(10); LP (1);<br>NA (34)         |
| Schee et al.<br>(1990)        | M<br>F                      | 46<br>31                      | Mass<br>Multiple nodules                                                                                                                                                                                                                          | Yes<br>No                        | NA<br>NA                                                                                                               | Non-diagnostic<br>Non-diagnostic                                                                                                                                                              | Segmental resection<br>Wedge resection                                                                 | NS<br>MC                                        |
| Chetty et al.<br>(1995)       | F<br>M<br>M                 | 24<br>48<br>58                | Mass<br>Consolidation<br>Mass                                                                                                                                                                                                                     | No<br>Yes<br>No                  | NA<br>NA<br>NA                                                                                                         | Atypical large cells<br>NA<br>NA                                                                                                                                                              | Open lung biopsy<br>Open lung biopsy<br>Open lung biopsy                                               | NA<br>NA<br>NA                                  |
| Boshnakova<br>et al. (2000)   | M<br>M                      | 15<br>42                      | Mass<br>Reticular infiltrates                                                                                                                                                                                                                     | No<br>No                         | NA<br>TB; pneumonia                                                                                                    | Eosinophilic granuloma<br>Interstitial lymphocytic<br>pneumonitis and fibrosis                                                                                                                | Lobectomy<br>Autopsy                                                                                   | NS<br>MC                                        |
| Rodriguez et<br>al. (2006)    | M<br>M<br>M<br>F<br>F       | 46<br>17<br>34<br>42<br>48    | Mass<br>Consolidation<br>Consolidation<br>Mass<br>Mass                                                                                                                                                                                            | No<br>No<br>No<br>Yes<br>Yes     | Neoplasm<br>Pneumonia<br>NA<br>Neoplasm<br>Neoplasm                                                                    | NA<br>Malignant lymphoma;<br>Langerhans cell histiocytosis<br>Bronchiocentric granulomatosis;<br>lymphomatoid granulomatosis;<br>large cell lymphoma<br>NA<br>Poorly differentiated carcinoma | Pneumonectomy<br>Wedge biopsy<br>Lobectomy<br>Bronchial biopsy<br>Pneumonectomy                        | MC<br>NS<br>MC<br>MC<br>MC                      |
| Codrich et al.<br>(2006)      | M                           | 11                            | Parenchymal density                                                                                                                                                                                                                               | No                               | Atelectasis due to foreign<br>body/mucus plug, atypical                                                                | Chronic inflammation                                                                                                                                                                          | Lobectomy                                                                                              | MC                                              |

| pneumonia, or TB; infected pulmonary congenital malformation; malignant nodal enlargement |   |    |                                   |     |                                                                                     |                                                  |                   |    |
|-------------------------------------------------------------------------------------------|---|----|-----------------------------------|-----|-------------------------------------------------------------------------------------|--------------------------------------------------|-------------------|----|
| Pai et al. (2006)                                                                         | F | 30 | Solitary nodular lesion           | No  | Round pneumonia; TB                                                                 | Non-diagnostic                                   | Wedge biopsy      | NS |
| Bakan et al. (2007)                                                                       | M | 21 | Cavitary lesion and consolidation | Yes | Lung abscess; TB; complicated hydatid cyst; septic emboli; Wegener's granulomatosis | Pneumonia                                        | Wedge biopsy      | NA |
| Tillawi (2007)                                                                            | M | 21 | Mass                              | No  | Langerhans cell histiocytosis; Wegener's granulomatosis                             | Non-diagnostic                                   | Wedge biopsy      | NS |
|                                                                                           | F | 32 | Mass                              | Yes | Infectious condition                                                                | Non-diagnostic                                   | Wedge biopsy      | NS |
| Saad et al. (2003)                                                                        | F | 21 | Consolidation                     | No  | Pneumonia; pulmonary embolism                                                       | NA                                               | Segmentectomy     | NS |
| Kumar et al. (2008)                                                                       | M | 36 | Mass                              | No  | Infectious condition                                                                | Non-small cell lung carcinoma                    | Lymph node biopsy | NS |
| Malur et al. (2009)                                                                       | F | 43 | Mass                              | No  | NA                                                                                  | Inflammatory lesion                              | Resection         | NA |
| Lluch-Garcia et al. (2010)                                                                | M | 21 | Cavitary lesion                   | Yes | Pulmonary abscess                                                                   | Suspicious for HL                                | Wedge biopsy      | NS |
| Homma et al. (2010)                                                                       | F | 58 | Cavitary mass                     | No  | NA                                                                                  | Suspected adenocarcinoma                         | Pneumonectomy     | NS |
| Oka et al. (2010)                                                                         | F | 64 | Mass                              | No  | NA                                                                                  | NA                                               | Resection         | NS |
| Binesh et al. (2011)                                                                      | F | 54 | Multiple nodules                  | No  | NA                                                                                  | NA                                               | Wedge biopsy      | NS |
| Valizadeh et al. (2012)                                                                   | M | 28 | Consolidation                     | No  | TB                                                                                  | Chronic non-caseating granulomatous inflammation | Wedge biopsy      | NA |
| Simon et al. (2012)                                                                       | M | 30 | Consolidation                     | No  | Atypical pneumonia; TB                                                              | Non-diagnostic                                   | Resection         | LR |

|                              |   |    |                                                             |     |                                            |                                                                |                        |         |
|------------------------------|---|----|-------------------------------------------------------------|-----|--------------------------------------------|----------------------------------------------------------------|------------------------|---------|
| Ezzine-Baccari et al. (2012) | F | 23 | Consolidation with cavity                                   | No  | NA                                         | Granulation tissue, suspicious for TB                          | Wedge biopsy           | MC      |
| McElnay et al. (2013)        | F | 61 | Mass                                                        | Yes | NA                                         | Solitary fibrous tumor                                         | Resection              | NS      |
| Fratoni et al. (2013)        | F | 27 | Mass                                                        | No  | NA                                         | Non-diagnostic                                                 | Wedge biopsy           | NS      |
| Cooksley et al. (2014)       | F | 28 | Consolidation/mass with multiple cavities                   | No  | TB; congenital cystic adenoid malformation | Non-specific acute inflammation; Langerhans cell histiocytosis | Wedge biopsy           | NS      |
| Schild et al. (2014)         | F | 53 | Mass                                                        | No  | NA                                         | Acute and organizing pneumonia                                 | Lobectomy              | NS      |
| Tanveer et al. (2015)        | F | 15 | Consolidation                                               | No  | TB                                         | Non-diagnostic                                                 | Lobectomy              | NS      |
| Lowenthal et al. (2017)      | M | 35 | Consolidation with cavitation and multiple cavitory nodules | No  | TB                                         | NA                                                             | Transbronchial biopsy  | NA      |
| El Hage et al. (2017)        | F | 27 | Multiple mass with cavitation                               | Yes | Community-acquired pneumonia               | Suspicion of HL                                                | CT-guided biopsy       | NS      |
| Abid et al. (2018)           | M | 40 | Cavitory consolidation                                      | No  | Bronchitis; lung cancer                    | Consistent with HL                                             | Bronchoscopic biopsy   | NA      |
| Aljehani et al. (2018)       | M | 16 | Multiloculated cavitory lesion                              | Yes | NA                                         | Non-diagnostic                                                 | Wedge biopsy           | NS      |
|                              | F | 29 | Multiloculated cavitory mass                                | Yes | NA                                         | Consistent with HL                                             | CT-guided biopsy       | NS      |
| Conti et al. (2018)          | F | 33 | Mass                                                        | Yes | Asthma; lymphoma                           | HL                                                             | CT-guided biopsy       | NS      |
| Parente et al. (2020)        | F | 18 | Multiple cavitory lesions                                   | No  | NA                                         | HL                                                             | Fine needle aspiration | NA      |
| Chwedhary et al. (2020)      | M | 24 | Mass                                                        | No  | NA                                         | HL with histoplasmosis                                         | Open biopsy            | NA      |
| Bertoglio et al. (2021)      | M | 37 | Consolidation                                               | Yes | TB                                         | Infection; granulomatosis with polyangiitis                    | Resection              | Classic |

|                                            |   |    |                                                              |     |                                                                   |                      |                  |    |
|--------------------------------------------|---|----|--------------------------------------------------------------|-----|-------------------------------------------------------------------|----------------------|------------------|----|
| Chiu et al.<br>(2021)                      | M | 16 | Consolidation                                                | Yes | TB                                                                | HL                   | Resection        | NS |
| Kanitra et al.<br>(2021)                   | F | 15 | Fluid collection and multiloculated effusion with cavitation | Yes | Necrotizing pneumonia                                             | HL                   | CT-guided biopsy | NA |
| Sun et al.<br>(2021)                       | M | 61 | Multiple consolidation and nodules                           | No  | Seronegative rheumatoid arthritis-associated organizing pneumonia | Organizing pneumonia | VATS biopsy      | NS |
| Jung et al.<br>(2022;<br>present<br>study) | F | 71 | Mass                                                         | Yes | Lung cancer                                                       | HL                   | CT-guided biopsy | MC |
|                                            | M | 37 | Mass                                                         | Yes | Lung cancer                                                       | HL                   | CT-guided biopsy | LR |
|                                            | M | 39 | Mass                                                         | Yes | Lung cancer                                                       | Suggestive of HL     | CT-guided biopsy | NA |
|                                            | F | 41 | Mass                                                         | Yes | Lung cancer                                                       | Atypical pneumocytes | Resection        | NS |
|                                            | M | 33 | Mass                                                         | Yes | Lung cancer                                                       | HL                   | CT-guided biopsy | NA |
|                                            | F | 47 | Mass                                                         | Yes | Lung cancer                                                       | CGI with necrosis    | Resection        | NS |
|                                            | F | 27 | Mass                                                         | Yes | Pulmonary sarcoma                                                 | HL                   | CT-guided biopsy | NS |
|                                            | F | 41 | Mass                                                         | Yes | Lung cancer                                                       | HL                   | CT-guided biopsy | NA |
|                                            | F | 48 | Consolidation                                                | No  | TB                                                                | Non-diagnostic       | Resection        | NS |
|                                            | M | 72 | Consolidation                                                | Yes | Pneumonia                                                         | HL                   | CT-guided biopsy | MC |

CGI: chronic granulomatous inflammation; CT: computed tomography; F: female; HL: Hodgkin lymphoma; LAP: lymphadenopathy; M: male; MC: mixed cellularity; NA: not applicable; NS: nodular sclerosis; LP: lymphocyte predominant; LR: lymphocyte-rich; TB: tuberculosis; VATS: video-assisted thoracoscopic surgery.

**Supplementary Table S5.** Differences in clinicopathological characteristics between our 10 cases and previously reported 105 cases of PPHL.

| Characteristic                     |                         | Number of cases (%) |                           | Fisher's exact<br><i>p</i> -value |
|------------------------------------|-------------------------|---------------------|---------------------------|-----------------------------------|
|                                    |                         | Our cases<br>(n=10) | Previous cases<br>(n=105) |                                   |
| Sex                                | Male                    | 4 (40)              | 47 (44.7)                 | 1.000                             |
|                                    | Female                  | 6 (60)              | 58 (55.2)                 |                                   |
| Age (years)                        | ≤40                     | 4 (40)              | 62 (59.0)                 | 0.320                             |
|                                    | >40                     | 6 (60)              | 43 (40.9)                 |                                   |
| CT finding                         | Single mass             | 8 (80)              | 45 (43.2)                 | 0.484                             |
|                                    | Consolidation           | 2 (20)              | 24 (23.0)                 |                                   |
| Initial clinical                   | Malignancy              | 8 (80)              | 6 (20)                    | 0.002*                            |
| Impression                         | Inflammatory lesion     | 2 (20)              | 21 (70)                   |                                   |
| Initial<br>pathologic<br>diagnosis | Lymphoma                | 7 (70)              | 22 (43.1)                 | 0.170                             |
|                                    | Others/Non-diagnostic   | 3 (30)              | 29 (56.8)                 |                                   |
| Confirmatory<br>method             | Small biopsy/aspiration | 7 (70)              | 21 (27.6)                 | 0.011*                            |
|                                    | Open biopsy/resection   | 3 (30)              | 55 (72.3)                 |                                   |
| Subtype                            | Nodular sclerosis       | 4 (40.0)            | 39 (66.1)                 | 0.115                             |
|                                    | Others                  | 6 (60.0)            | 20 (33.8)                 |                                   |

\*Statistically significant.
